# Supplementary material for: A new dibenzothiophene-based dual-channel chemosensor for cyanide with aggregation induced emission
Source: Royal Society of Chemistry journal article supplement (doi:10.1039/c9ay01806a), 2019-01-01

**A new dibenzothiophene-based dual-channel chemosensor for  
cyanide with Aggregation induced emission**

Qiqi Zou, Furong Tao, Zhen Xu, Yunqiao Ding, Yan Tian, Yuezhi Cui\*

School of Chemical and Pharmaceutical Engineering, Qilu University of Technology  
(Shandong Academy of Sciences), Jinan 250353, P. R. China.

Tel: +86 531 89631208; Fax: +86 531 89631760;

E-mail address: [yuezhicui@163.com](mailto:yuezhicui@163.com)

**Figure caption**

**Figure S1** The  $^1\text{H}$  NMR of **DTB**.

**Figure S2** The  $^{13}\text{C}$  NMR of **DTB**.

**Figure S3** The HRMS spectrum of **DTB**.

**Figure S4** The FT-IR spectrum of **DTB**.

**Figure S5** The UV-vis absorption spectrum of **DTB** (10  $\mu\text{M}$ ) in pure DMSO.

**Figure S6** The HRMS spectrum of **DTB-CN $^-$** .

Figure S1

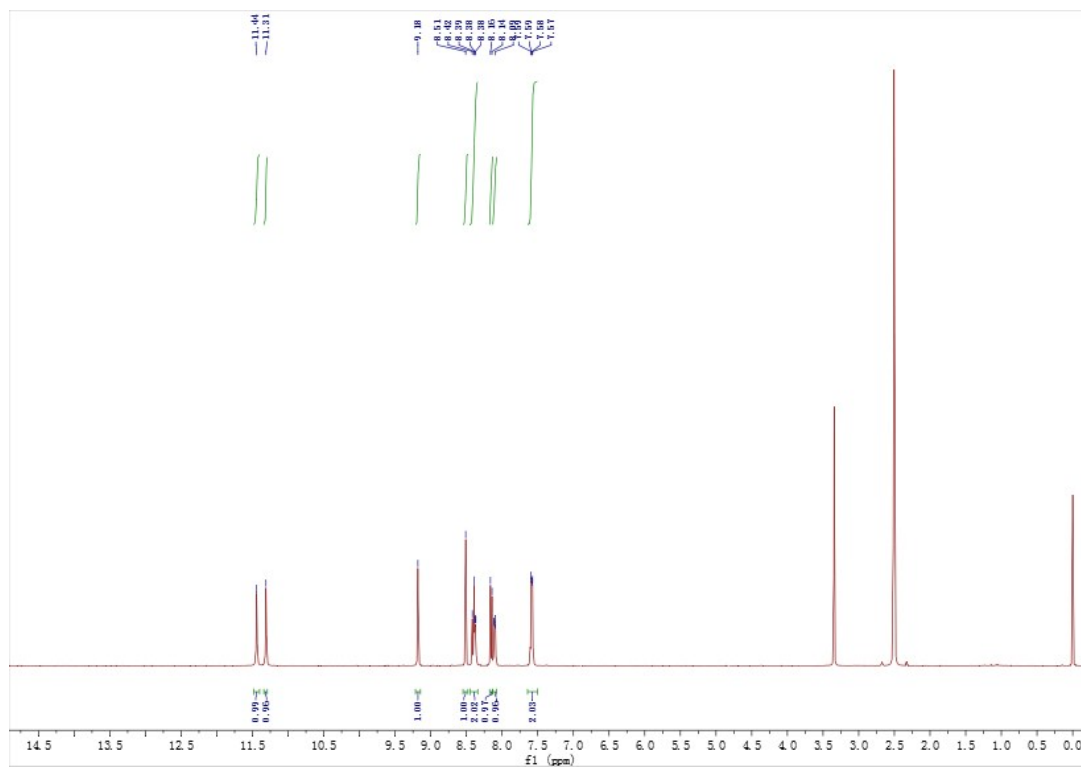

Figure S2

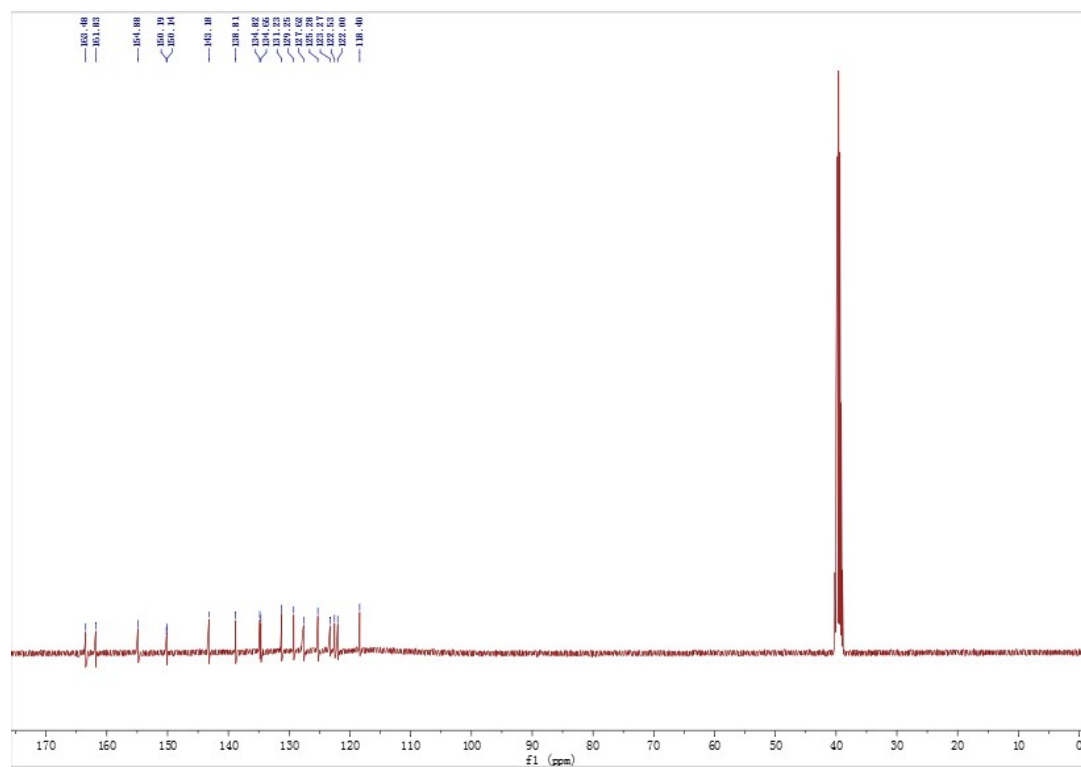

**Figure S3**

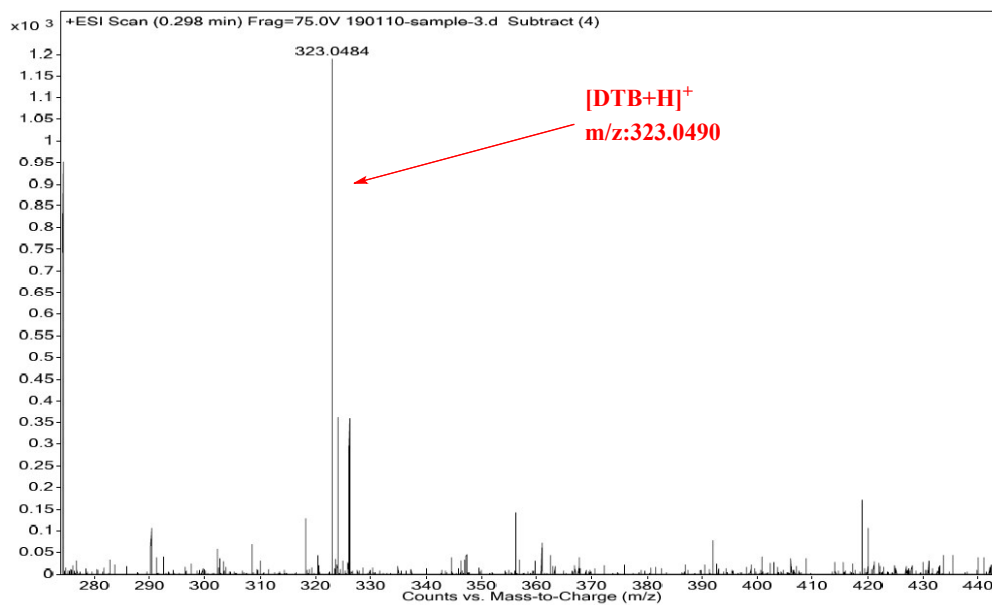

**Figure S4**

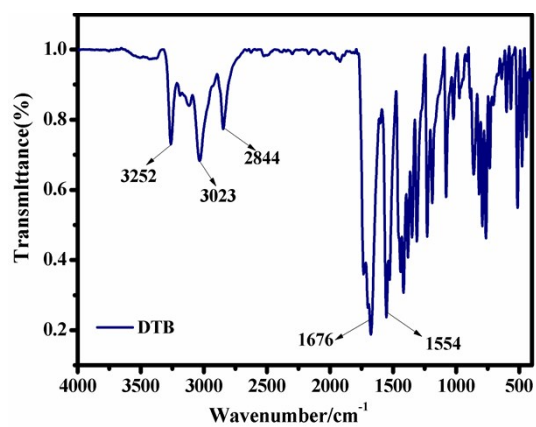

**Figure S5**

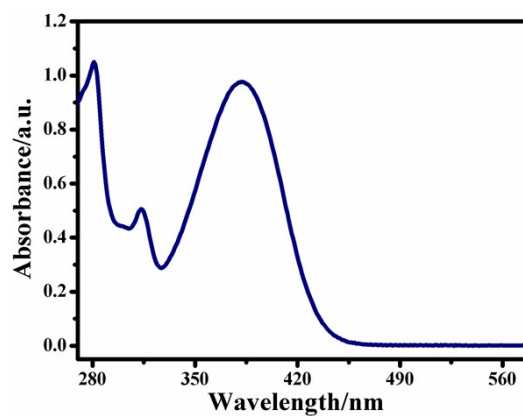

Figure S6

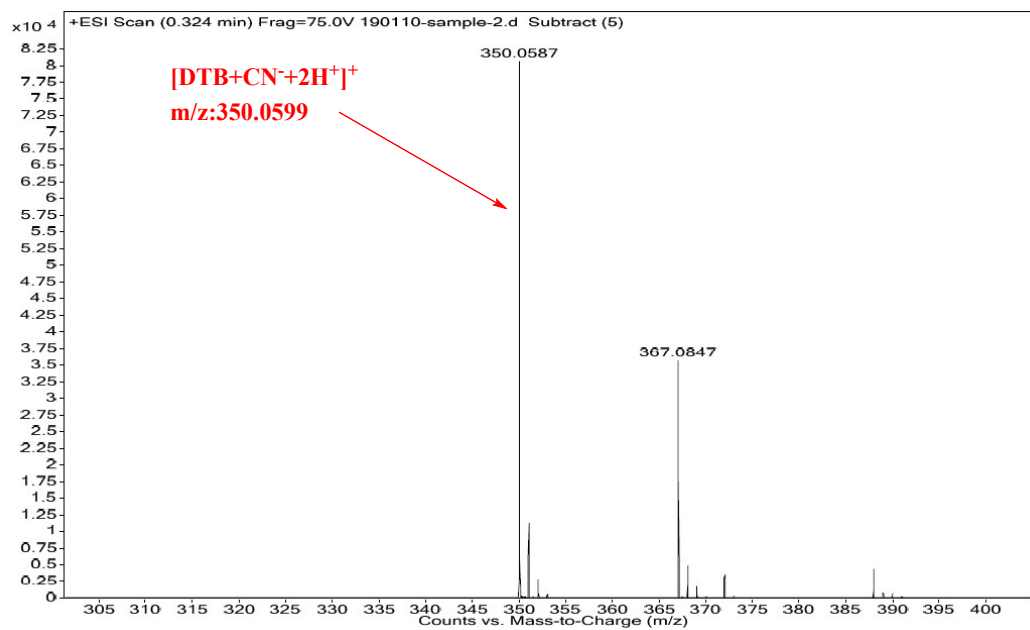

Supplement: c9ay01806a1.pdf [file c9ay01806a1.pdf]
